# Supplementary material for: Insight into global trends in aerosol composition from 2005 to 2015 inferred from the OMI Ultraviolet Aerosol Index
Source: Copernicus journal article supplement (doi:10.5194/acp-18-8097-2018), 2018-06-08
Supplement: Supplementary file [file acp-18-8097-2018-supplement.pdf]

Supplement of Atmos. Chem. Phys., 18, 8097–8112, 2018  
<https://doi.org/10.5194/acp-18-8097-2018-supplement>  
© Author(s) 2018. This work is distributed under  
the Creative Commons Attribution 4.0 License.

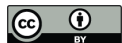

*Supplement of*

## **Insight into global trends in aerosol composition from 2005 to 2015 inferred from the OMI Ultraviolet Aerosol Index**

**Melanie S. Hammer et al.**

*Correspondence to:* Melanie S. Hammer ([melanie.hammer@dal.ca](mailto:melanie.hammer@dal.ca))

The copyright of individual parts of the supplement might differ from the CC BY 4.0 License.

1 **Supplement**

2

3 **1. Comparison of simulated and OMI SO<sub>2</sub> and NO<sub>2</sub> columns**

4 We calculate the trends in simulated and OMI SO<sub>2</sub> and NO<sub>2</sub> columns (Figures S1 and S2)  
5 to evaluate our GEOS-Chem simulation. There is broad consistency between the trends in our  
6 simulated SO<sub>2</sub> and NO<sub>2</sub> columns with those from OMI. There are negative trends in both OMI and  
7 simulated SO<sub>2</sub> columns over most of North America, Europe, northern South America, central  
8 Africa, and east China. There is a mixture of negative and positive trends in SO<sub>2</sub> over North Africa.  
9 There are positive trends in SO<sub>2</sub> over southern South America, southern Africa, the Middle-East,  
10 India, most of China, and Australia. The trends in NO<sub>2</sub> columns correspond to the trends in SO<sub>2</sub>  
11 columns in almost all regions except for eastern China, which shows positive trends in NO<sub>2</sub>  
12 columns for both the simulation and OMI.

13

14 **2. Comparison of simulated and satellite AOD**

15 Figure S3 shows the trends in GEOS-Chem and satellite AOD for 2005-2015 filtered based  
16 on coincident OMI pixels with persistent cloud fraction greater than 5%. Overall the trends in  
17 simulated AOD are consistent with the range of trends in satellite AOD. The GEOS-Chem AOD  
18 (Figure S3a) shows negative trends in AOD over the eastern United States and West Africa, and  
19 positive trends over the western United States, the Middle-East, India, and most of China. Figure  
20 S3b shows the trends in AOD from MISR. Significant negative trends are apparent over the eastern  
21 United States, Europe, central South America, parts of North Africa, West Africa, and  
22 Mongolia/Inner Mongolia. There are small positive trends over west and central United States,  
23 parts of South America, parts of North Africa, southern Africa, parts of the Middle-East, parts of  
24 China, and Australia, with stronger positive trends over India. AOD from MODIS Dark Target  
25 (Figure S3c) shows negative trends over eastern United States, Europe, and central South America,  
26 with small positive trends over southern Africa, most of Asia, and Australia, and stronger positive  
27 trends over Canada, southern South America, India, and over Central Asia between the Caspian  
28 Sea and the Aral Sea. Figure S3d shows the trends in AOD from MODIS Deep Blue. There small  
29 negative trends over eastern United States, central South America, Europe, parts of North Africa  
30 and West Africa, with stronger negative trends over the Indo-Gangetic Plain and Mongolia/Inner  
31 Mongolia. There are positive trends over southern Africa, most of Asia, and Australia, and stronger

32 positive trends over Canada, southern South America, parts of the Middle-East, India, and over  
33 Central Asia between the Caspian Sea and the Aral Sea. Figures S3e and S3f show the trends in  
34 AOD from the OMI OMAERUV algorithm at 388 nm and 500 nm, respectively. Significant  
35 negative trends are apparent for both wavelengths over central South America, West Africa, the  
36 Indo-Gangetic Plain, and Mongolia/Inner Mongolia. Negative trends over Europe and parts of  
37 North Africa are more pronounced in the OMI AOD at 388 nm (Figure S3e) than at 500 nm (Figure  
38 S3f). There are small positive trends over west and central United States, parts of South America,  
39 parts of North Africa, southern Africa, parts of China, and Australia, with stronger positive trends  
40 over Canada, India, and over Central Asia between the Caspian Sea and the Aral Sea.

41  
42  
43  
44  
45  
46

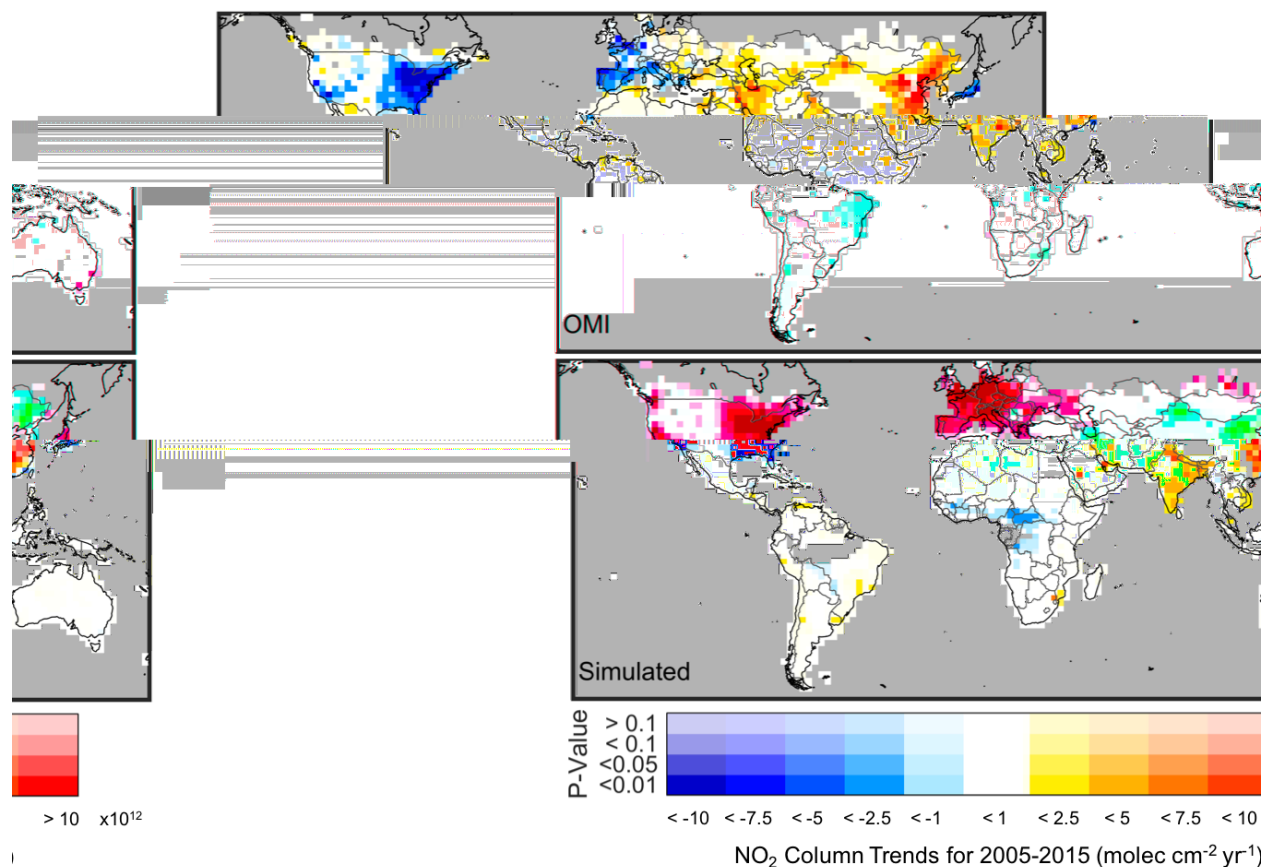

47

48 **Figure S1:** Trends in OMI (top panel) and GEOS-Chem (bottom panel) NO<sub>2</sub> columns calculated  
 49 from the Generalized Least Squares regression of monthly time series values over 2005-2015. The  
 50 OMI NO<sub>2</sub> columns are from NASA's OMNO2 version 2.1 product. The opacity of the colors  
 51 indicates the statistical significance of the trend. Gray indicates persistent cloud fraction greater  
 52 than 5%.

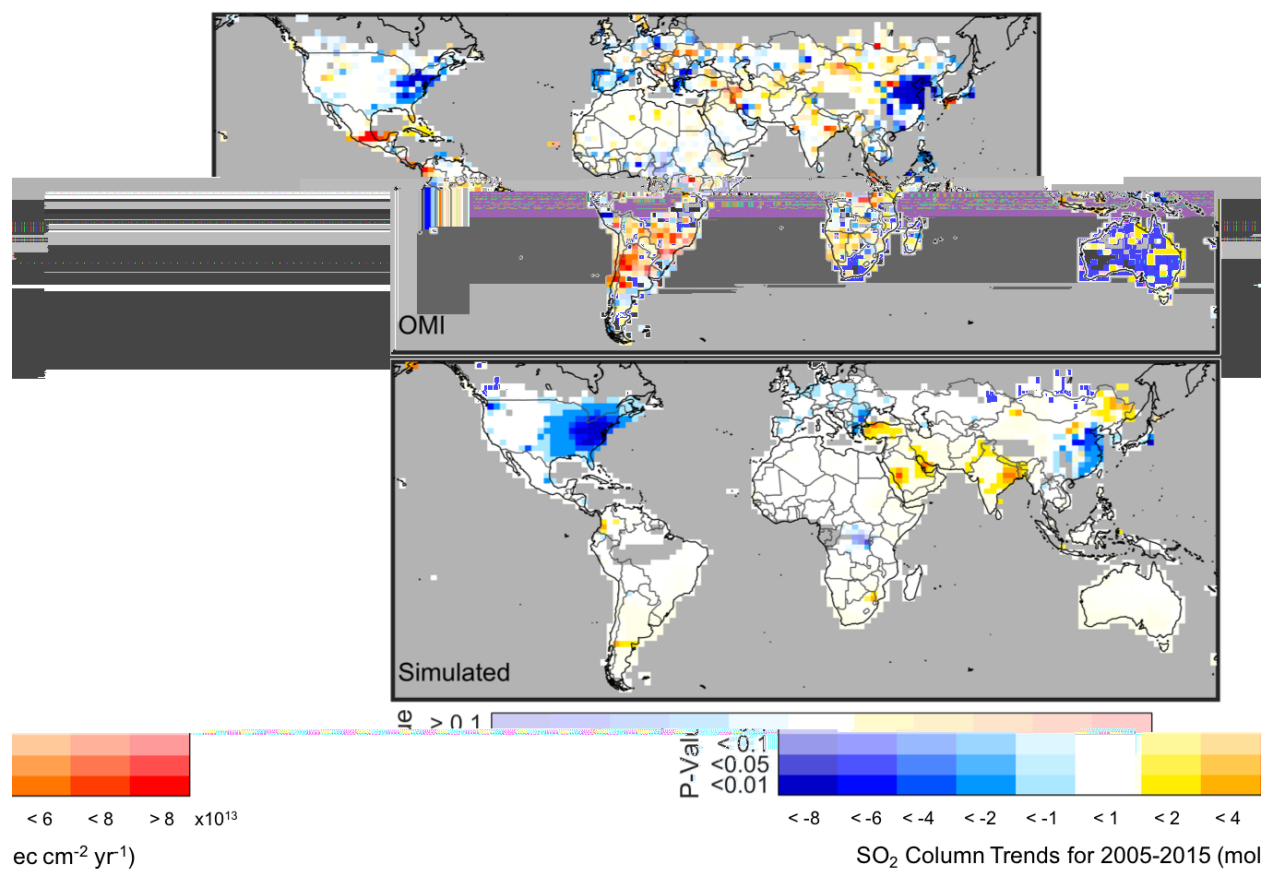

53

54 **Figure S2:** Trends in OMI (top panel) and GEOS-Chem (bottom panel) SO<sub>2</sub> columns calculated  
 55 from the Generalized Least Squares regression of monthly time series values over 2005-2015. The  
 56 OMI SO<sub>2</sub> columns are from NASA's OMSO<sub>2</sub> version 1.2.0 product. The opacity of the colors  
 57 indicates the statistical significance of the trend. Gray indicates persistent cloud fraction greater  
 58 than 5%.

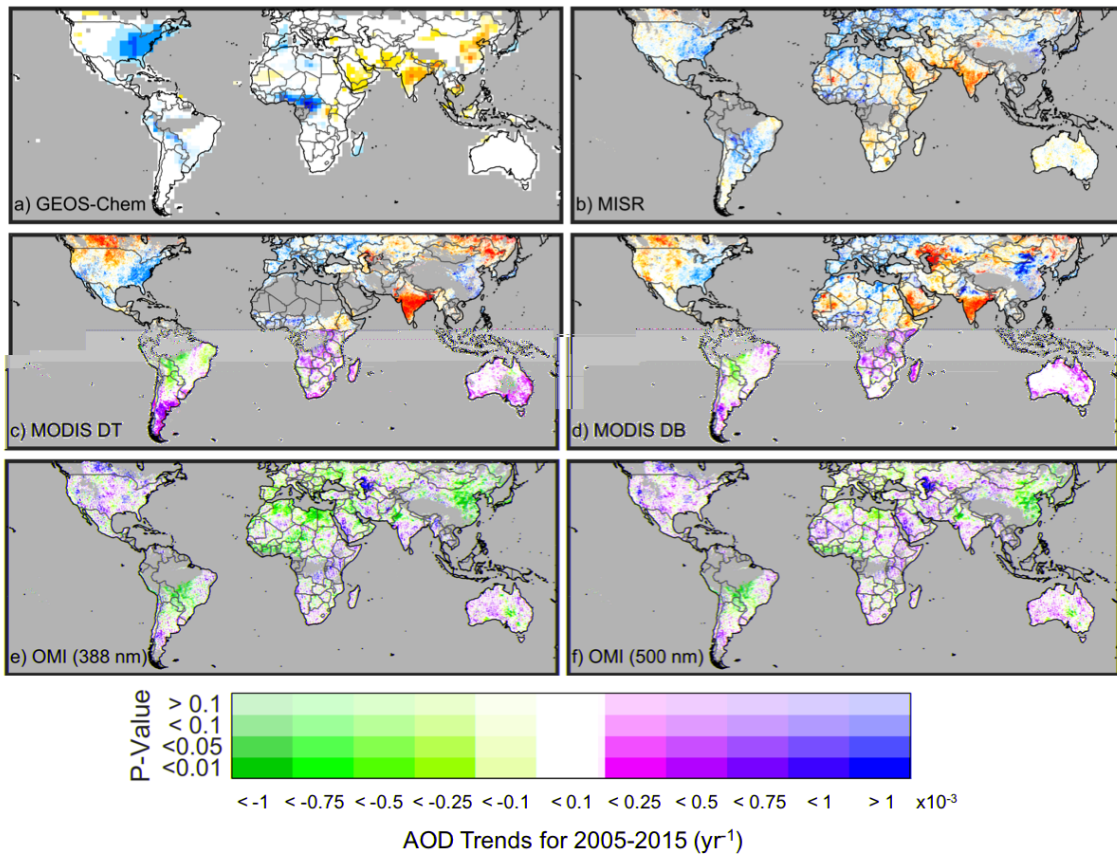

59  
 60 **Figure S3:** Trends in aerosol optical depth from a) GEOS-Chem (550 nm), b) MISR v22 (550  
 61 nm), c) MODIS Terra collection 6 Dark Target algorithm (550 nm), d) the MODIS Terra collection  
 62 6 Deep Blue algorithm (550 nm), and the OMI OMAERUV algorithm for e) 388 nm and f) 500  
 63 nm. The GEOS-Chem simulation is sampled coincidentally with the OMI UVAI product. The trends  
 64 are calculated from the Generalized Least Squares regression of monthly time series values over  
 65 2005-2015. The opacity of the colors indicates the statistical significance of the trend. Gray  
 66 indicates persistent cloud fraction greater than 5%.
